# Supplementary material for: Modification of CrCeOx with Mo: improved SO2 resistance and N2 selectivity for NH3-SCR at medium–low temperatures
Source: Royal Society of Chemistry journal article supplement (doi:10.1039/d2cy00679k), 2022-01-01
Supplement: d2cy00679k1.pdf [file d2cy00679k1.pdf]

## Supplementary Material

### Modification of CrCeO<sub>x</sub> with Mo: Improved SO<sub>2</sub> resistance and N<sub>2</sub> selectivity for NH<sub>3</sub>-SCR at medium-low temperature

Junge Yun<sup>a,b</sup>, Zhangfa Tong<sup>c</sup>, Xiaomei Hu<sup>b</sup>, Cheng Zhao<sup>b</sup>, Chengxian Liu<sup>b,c</sup>,

Dingsheng Chen<sup>b</sup>, Hanbing Zhang<sup>a,\*</sup>, Zhihang Chen<sup>b,#</sup>

<sup>a</sup> School of Resources, Environment and Materials, Guangxi University, Nanning 530004, China

<sup>b</sup> The Key Laboratory of Water and Air Pollution Control of Guangdong Province, Air Pollution Control Engineering Laboratory of Guangdong Province, South China Institute of Environmental Sciences, MEE, Guangzhou 510655, China

<sup>c</sup> College of Chemistry and Chemical Engineering, Guangxi University, Nanning 530004, China

This part of the data were the previous research data of our group, and the results are being published. In Fig A1, the NH<sub>3</sub> adsorption peaks on CrCeO<sub>x</sub> were mainly in the 900 ~ 1700 cm<sup>-1</sup> and 3100 ~ 3700 cm<sup>-1</sup> regions. The bands at 1012, 1237, and 1604 cm<sup>-1</sup> could be attributed to coordinated NH<sub>3</sub> on Lewis acid site.<sup>1</sup> Similarly, the bands at 987 as well as 1087 cm<sup>-1</sup> could be attributed to NH<sub>3</sub>(ad) at Lewis acid site. The band at 1056 cm<sup>-1</sup> was attributed to an intermediate species (-NH<sub>2</sub>) formed by the dehydrogenation reaction of NH<sub>3</sub>, and the band at 1367 cm<sup>-1</sup> was attributed to the species formed by adsorption of ammonia oxidation.<sup>2</sup> The band at 1323 cm<sup>-1</sup> was attributed to NH<sub>4</sub><sup>+</sup> species formed by adsorption NH<sub>3</sub> on the Brønsted acid sites.<sup>3</sup> Three bands were observed in the N-H oscillation region at 3250, 3360 and 3160 cm<sup>-1</sup>, respectively. The band at 3700 cm<sup>-1</sup> might belonged to the O-H oscillatory bond on the surface.<sup>4</sup> It indicated that the Lewis acid site is dominant on the catalyst surface and exist mainly in coordinated NH<sub>3</sub>(ad). The intensity of the bands attributed to coordinated NH<sub>3</sub> at 987, 1012, 1232 and 1604 cm<sup>-1</sup> decreased rapidly after the introduction of NO + O<sub>2</sub>. The band at 1580 cm<sup>-1</sup> could be attributed to the bidentate nitrate species formed after NO adsorption.<sup>5,6</sup> While the new band at 1280 cm<sup>-1</sup> was attributed to the area of overlap between NH<sub>3</sub>(ad) and NO adsorbed, therefore cannot be classified. During the first few minutes, the band at 1323 cm<sup>-1</sup> was attributed to NH<sub>4</sub><sup>+</sup> ions did not change. With the continuous flux of NO and O<sub>2</sub>, the band intensity at NH<sub>4</sub><sup>+</sup> began to gradually decrease. After 5 min, the bands of nitrate species generated after the introduction of NO + O<sub>2</sub> also started to

\* Corresponding authors.

E-mail addresses: [coldicezhang0771@163.com](mailto:coldicezhang0771@163.com) (H. Zhang), [chenzhihang@scies.org](mailto:chenzhihang@scies.org) (Z. Chen).

appear and weakened with the increasing time. The overlapping bands at  $1280\text{ cm}^{-1}$  also gradually weakened, indicating that  $\text{NH}_4^+$  was consumed. It could be concluded that the bands attributed to the pre-adsorbed  $\text{NH}_3$  started to weaken and the adsorbed  $\text{NH}_3(\text{ad})$  species on Lewis acid site disappeared rapidly with the introduction of  $\text{NO} + \text{O}_2$ , indicating that the reaction proceeded rapidly. The band at  $1353\text{ cm}^{-1}$  might be  $\text{NH}_4^+$  migrating to the higher band or it may be an intermediate product generated by the reaction between adsorbed  $\text{NH}_3$  and  $\text{NO}_x$ .<sup>1,7</sup> In this paper, the band attributed to  $\text{NH}_4^+$  adsorbed on the Brønsted acid also weakened significantly with time, so the band at  $1353\text{ cm}^{-1}$  was attributed to the intermediate species, indicated that  $\text{NH}_4^+$  ions on Brønsted acid site also participated in SCR process. The band at  $1085\text{ cm}^{-1}$  did not change with time. It has been reported that there is a band at  $1045\text{ cm}^{-1}$  could be assigned to  $\text{Cr}=\text{O}$ .<sup>8</sup> In contrast, the XPS results indicated that Cr was mainly in  $3^+$  as well as  $6^+$  and did not contain  $\text{Cr}^{2+}$ . Therefore, the band at  $1045\text{ cm}^{-1}$  was assigned to  $\text{Cr(III)=O}$ .

As shown in Fig A2, the intensity of the adsorption peak by  $\text{NO} + \text{O}_2$  was much weaker than that of  $\text{NH}_3$ , which most likely due to the lack of basic sites on the catalyst surface. The bands at  $1263$  and  $1376\text{ cm}^{-1}$  were attributed to bridged nitrate species.<sup>4</sup> When introduction of  $\text{NH}_3$ , new oscillation bands were observed at  $1250$ ,  $1307$ , and  $1604\text{ cm}^{-1}$ . The band at  $1604\text{ cm}^{-1}$  was attributed to  $\text{NH}_3(\text{ad})$ . Since the intensity of the adsorption peak of  $\text{NO}_x$  was much lower than that of  $\text{NH}_3(\text{ad})$ , the band at  $1250\text{ cm}^{-1}$  was attributed to  $\text{NH}_3(\text{ad})$ . The band at  $1307\text{ cm}^{-1}$  was attributed to the migration of  $\text{NH}_4^+$  from  $1323\text{ cm}^{-1}$ .<sup>9</sup> With the increase of adsorption time, the adsorption peak of  $\text{NO}_x$  did not change significantly, indicated that the SCR process between  $\text{NH}_3(\text{g})$  and  $\text{NO}_x(\text{ad})$  did not react.

From the results of *in-situ* DRIFTS, it could be observed that  $\text{NH}_3$  is strongly adsorbed on the surface of  $\text{CrCeO}_x$ , generating  $\text{NH}_3(\text{ad})$  and  $\text{NH}_4^+$ , of which  $\text{NH}_3(\text{ad})$  was dominant. The adsorption strength of  $\text{NO}_x$  on the surface was weaker than that of  $\text{NH}_3$ . The  $\text{NH}_3$ -SCR process could occur between adsorbed  $\text{NH}_3(\text{ad})$  and  $\text{NO}(\text{g})$ , but not between co-adsorbed  $\text{NO}_x(\text{ad})$  and  $\text{NH}_3$ , indicated to the E-R mechanism.

## Notes and references

- 1 L. A. Chen, J. H. Li and M. F. Ge, *Environ. Sci. Technol.*, 2010, **44**, 9590-9596.
- 2 F. Cao, S. Su, J. Xiang, P. Y. Wang, S. Hu, L. S. Sun and A. C. Zhang, *Fuel*, 2015, **139**, 232-239.
- 3 S. J. Yang, Y. F. Guo, H. Z. Chang, L. Ma, Y. Peng, Z. Qu, N. Q. Yan, C. Z. Wang and J. H. Li, *Appl. Catal. B*, 2013, **136**, 19-28.

- 4 Z. B. Wu, B. Q. Jiang, Y. Liu, H. Q. Wang and R. B. Jin, *Environ. Sci. Technol.*, 2007, **41**, 5812-5817.
- 5 W. P. Shan, F. D. Liu, H. He, X. Y. Shi and C. B. Zhang, *Appl. Catal. B*, 2012, **115**, 100-106.
- 6 A. Trovarelli, *Catal Rev Sci Eng*, 1996, **38**, 439-520.
- 7 Y. Peng, C. X. Liu, X. Y. Zhang and J. H. Li, *Appl. Catal. B*, 2013, **140**, 276-282.
- 8 H. D. Liu, W. M. Li, R. L. Yue and Y. F. Chen, *Chinese J. Inorg. Chem.*, 2013, **29**, 2399-2404.
- 9 R. B. Jin, Y. Liu, Y. Wang, W. L. Cen, Z. B. Wu, H. Q. Wang and X. L. Weng, *Appl. Catal. B*, 2014, **148**, 582-588.

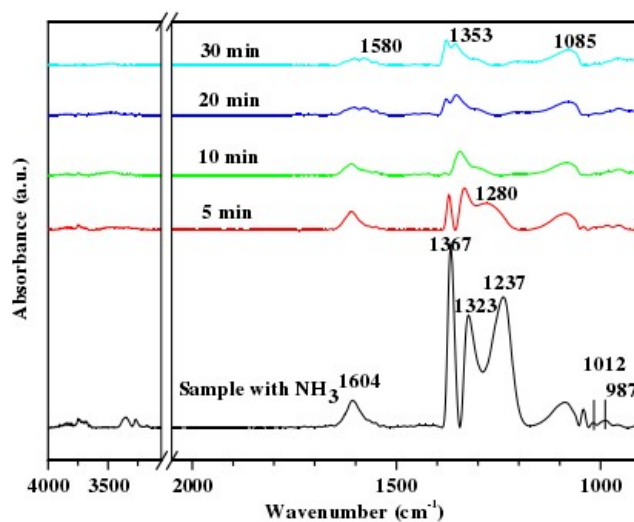

Fig. A1 DRIFT spectra of CrCeO<sub>x</sub> pretreated by 1000 ppm NH<sub>3</sub> followed by exposed to 1000 ppm NO + 3% O<sub>2</sub> for various times.

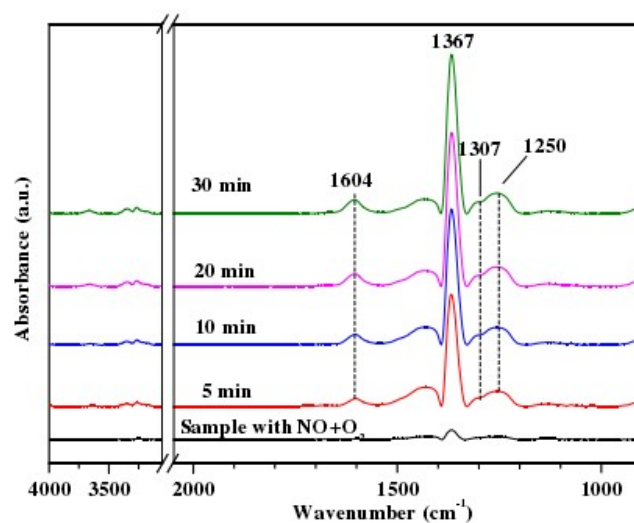

Fig. A2 DRIFT spectra of CrCeO<sub>x</sub> pretreated by 1000 ppm NO + 3% O<sub>2</sub> followed by exposed to 1000 ppm NH<sub>3</sub> for various times.

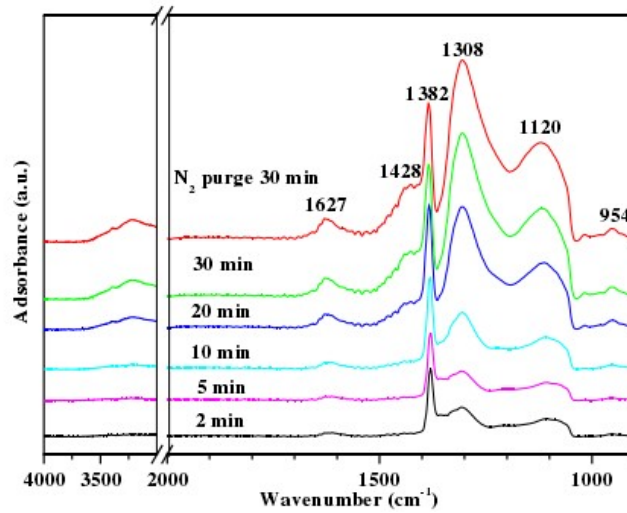

Fig. A3 DRIFT spectra of CrCeO<sub>x</sub> exposed to SO<sub>2</sub> + O<sub>2</sub> for various times and purged by N<sub>2</sub> for 30 min.

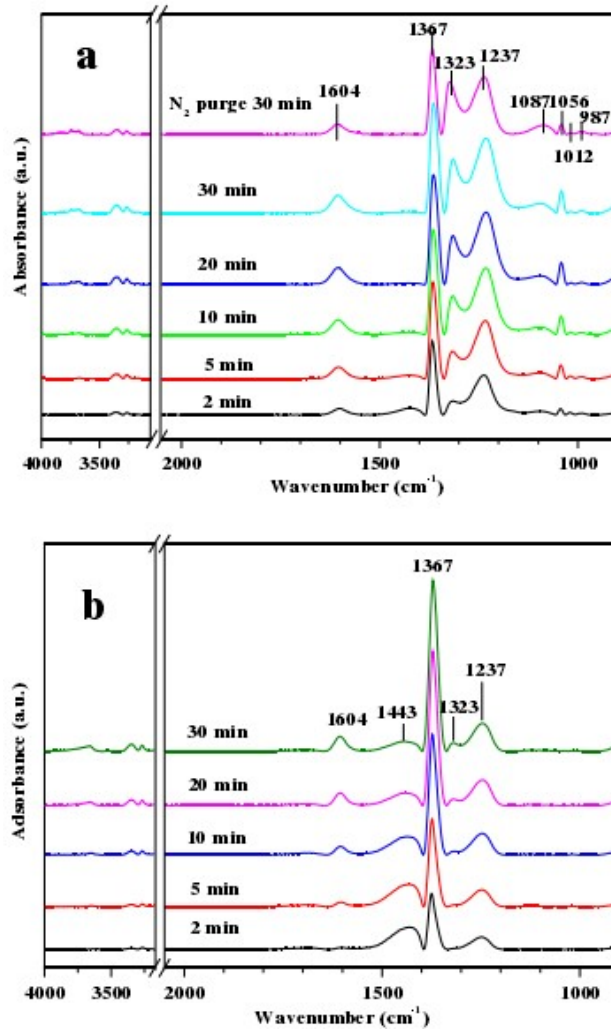

Fig. A4 DRIFT spectra of NH<sub>3</sub> adsorption on fresh and sulfated CrCeO<sub>x</sub> for various times.

a: Fresh Cr-CeO<sub>x</sub>, b: sulfated Cr-CeO<sub>x</sub>

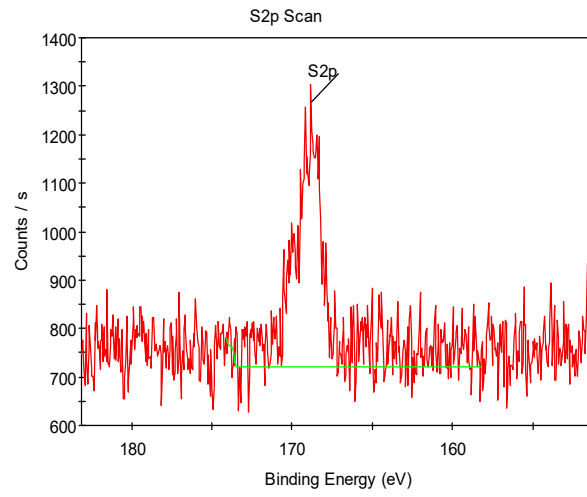

Fig. A5 The S2p scan spectrum of CrCeO<sub>x</sub>-s.

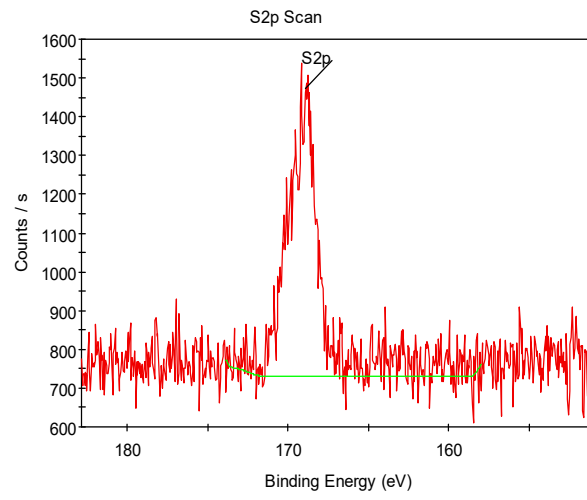

Fig. A6 The S2p scan spectrum of Mo(0.3)-CrCeO<sub>x</sub>-s.
